# Supplementary material for: Towards the practical application of Zn metal anodes for mild aqueous rechargeable Zn batteries
Source: Royal Society of Chemistry journal article supplement (doi:10.1039/d2sc01818g), 2022-01-01
Supplement: d2sc01818g1.pdf [file d2sc01818g1.pdf]

## Electronic Supplementary Information:

### Towards the practical application of Zn metal anodes for mild aqueous rechargeable Zn batteries

Ning Dong, Fenglin Zhang, and Huilin Pan \*

Department of Chemistry, Zhejiang University, Hangzhou, 310027, China

\* Corresponding author: panhuilin@zju.edu.cn

**Table S1.** The description of modification methods, CE values, current density and areal capacity of the reference in Figure 1g. (M: mol L<sup>-1</sup>, m: mol kg<sup>-1</sup>)

| Ref  | Electrolyte composition                                    | CE (%) | Note             | Current / capacity                                    |
|------|------------------------------------------------------------|--------|------------------|-------------------------------------------------------|
| [1]  | 2 M ZnSO <sub>4</sub> + 2 mM SeO <sub>2</sub>              | 99.6   | average CE       | 2 mA cm <sup>-2</sup> , 2 mAh cm <sup>-2</sup>        |
| [2]  | 2 M ZnSO <sub>4</sub> + 0.5 g L <sup>-1</sup> TMBAC        | 99.2   | average CE       | 1 mA cm <sup>-2</sup> , 1 mAh cm <sup>-2</sup>        |
| [3]  | 2 M ZnSO <sub>4</sub> + 5 mg mL <sup>-1</sup> silk peptide | 99.7   | average CE       | 1 mA cm <sup>-2</sup> , 1 mAh cm <sup>-2</sup>        |
| [4]  | 1 M ZnSO <sub>4</sub> + 0.2 wt% PAM                        | 99.65  | after 170 cycles | 2 mA cm <sup>-2</sup> , 2 mAh cm <sup>-2</sup>        |
| [5]  | 1 m Zn(TFSI) <sub>2</sub> + 20 m LiTFSI                    | 99.7   | after ~30 cycles | 1 mA cm <sup>-2</sup> , ~0.17 mAh cm <sup>-2</sup>    |
| [6]  | Zn(TFSI) <sub>2</sub> -TEEP@MOF-H <sub>2</sub> O           | 99.9   | after 300 cycles | 1 mA cm <sup>-2</sup> , 0.5 mAh cm <sup>-2</sup>      |
| [7]  | Zn(TFSI) <sub>2</sub> /Ace eutectic solution               | 99.7   | average CE       | CV: 1 mV s <sup>-1</sup> , ~0.61 mAh cm <sup>-2</sup> |
| [8]  | 2 M Zn(TfO) <sub>2</sub> + 40% vol DME                     | 99.7   | after 800 cycles | 1 mA cm <sup>-2</sup> , 1 mAh cm <sup>-2</sup>        |
| [9]  | 4 m Zn(TfO) <sub>2</sub> + 0.5 m Me <sub>3</sub> EtNOTF    | 99.9   | after 100 cycles | 0.5 mA cm <sup>-2</sup> , 0.5 mAh cm <sup>-2</sup>    |
| [10] | 1 M Zn(TfO) <sub>2</sub> in H <sub>2</sub> O:ACN =3:1      | 99.3   | average CE       | 1 mA cm <sup>-2</sup> , 1 mAh cm <sup>-2</sup>        |
| [11] | 4 m Zn(TfO) <sub>2</sub> + 2 m LiClO <sub>4</sub>          | 99.43  | average CE       | 1 mA cm <sup>-2</sup> , 1 mAh cm <sup>-2</sup>        |
| [12] | 2 m Zn(TfO) <sub>2</sub> in H <sub>2</sub> O:DMC=4:1       | 99.8   | average CE       | 5 mA cm <sup>-2</sup> , 2.5 mAh cm <sup>-2</sup>      |

**Table S2.** The description of modification methods, cycle life, CE values, current density and areal capacity in Zn-based half cells of the reference in Figure 2a. (M: mol L<sup>-1</sup>, m: mol kg<sup>-1</sup>)

| Ref  | Electrolyte composition                                              | Cycle life<br>(h) | CE (%) | Current / capacity                                    | DODs |
|------|----------------------------------------------------------------------|-------------------|--------|-------------------------------------------------------|------|
| [4]  | 1 M ZnSO <sub>4</sub> + 0.2 wt% PAM                                  | 2200              | 99.65  | 1 mA cm <sup>-2</sup> , 1 mAh cm <sup>-2</sup>        | 5.7% |
| [13] | 1 M ZnSO <sub>4</sub> in H <sub>2</sub> O:AN<br>(volume ratio 90:10) | 2640              | 99.65  | 1 mA cm <sup>-2</sup> , 2 mAh cm <sup>-2</sup>        | \    |
| [14] | 1 M ZnSO <sub>4</sub> + 0.5 wt% PEO                                  | 3000              | >99.5  | 1 mA cm <sup>-2</sup> , 1 mAh cm <sup>-2</sup>        | 0.7% |
| [6]  | Zn(TFSI) <sub>2</sub> -TEEP@MOF-H <sub>2</sub> O                     | 350               | 99.9   | 1 mA cm <sup>-2</sup> , 0.5 mAh cm <sup>-2</sup>      | \    |
| [15] | 1 M ZnTFSI <sub>2</sub> + 0.2 wt% PEO                                | 700               | 98.7   | 1 mA cm <sup>-2</sup> , 1 mAh cm <sup>-2</sup>        | 5.7% |
| [8]  | 2 M Zn(TfO) <sub>2</sub> + 40% vol DME                               | 1600              | 99.7   | 1 mA cm <sup>-2</sup> , 1 mAh cm <sup>-2</sup>        | 3.4% |
| [16] | 0.5 M Zn(TfO) <sub>2</sub> + 5 mM Cu(OAc) <sub>2</sub><br>in DMF     | 1700              | 99.6   | 0.5 mA cm <sup>-2</sup> ,<br>0.5 mAh cm <sup>-2</sup> | 0.4% |
| [9]  | 4 m Zn(TfO) <sub>2</sub> + 0.5 m Me <sub>3</sub> EtNOTF              | 2000              | 99.9   | 0.5 mA cm <sup>-2</sup> ,<br>0.5 mAh cm <sup>-2</sup> | \    |

**Table S3.** The description of modification methods, cycle life, current density and areal capacity in Zn || Zn symmetric cells of the reference in Figure 2a. (M: mol L<sup>-1</sup>, m: mol kg<sup>-1</sup>)

| Ref  | Electrolyte composition                                        | Cycle life<br>(h) | Current / capacity                                  | DODs |
|------|----------------------------------------------------------------|-------------------|-----------------------------------------------------|------|
| [17] | 1 M ZnSO <sub>4</sub> + 10 mM glucose                          | 2000              | 1 mA cm <sup>-2</sup> , 1 mAh cm <sup>-2</sup>      | 1.7% |
| [3]  | 2 M ZnSO <sub>4</sub> + 5 mg mL <sup>-1</sup> silk peptide     | 3000              | 1 mA cm <sup>-2</sup> , 1 mAh cm <sup>-2</sup>      | 1.7% |
| [18] | zeolite-modified 2 M ZnSO <sub>4</sub>                         | 4756              | 0.8 mA cm <sup>-2</sup> , 0.8 mAh cm <sup>-2</sup>  | 1.4% |
| [6]  | Zn(TFSI) <sub>2</sub> -TEEP@MOF-H <sub>2</sub> O               | 700               | 0.5 mA cm <sup>-2</sup> , 0.5 mAh cm <sup>-2</sup>  | \    |
| [7]  | Zn(TFSI) <sub>2</sub> /Ace eutectic solution                   | 1000              | 0.1 mA cm <sup>-2</sup> , 0.05 mAh cm <sup>-2</sup> | \    |
| [19] | ~30 mol% H <sub>2</sub> O in urea/LiTFSI/Zn(TFSI) <sub>2</sub> | 2400              | 0.1 mA cm <sup>-2</sup> , 0.74 mAh cm <sup>-2</sup> | 6.6% |
| [20] | 3 M Zn(TfO) <sub>2</sub> aqueous electrolyte at 0 °C           | 2500              | 1 mA cm <sup>-2</sup> , 1 mAh cm <sup>-2</sup>      | 0.9% |
| [8]  | 2 M Zn(TfO) <sub>2</sub> +40% vol DME                          | 5000              | 2 mA cm <sup>-2</sup> , 1 mAh cm <sup>-2</sup>      | 3.4% |
| [9]  | 4 m Zn(TfO) <sub>2</sub> + 0.5 m Me <sub>3</sub> EtNOTF        | 6000              | 0.5 mA cm <sup>-2</sup> , 0.25 mAh cm <sup>-2</sup> | \    |

**Table S4.** The average Coulombic efficiency and cycle life values of Zn anodes calculated from 2-4 parallel cells in the aqueous electrolytes with different salt concentrations of Zn || Cu (Ti or SS) and Zn || Zn cells in Figure 1g and 2a. (1 mA cm<sup>-2</sup> and 1 mAh cm<sup>-2</sup>).

|                                  | 0.5 M ZnSO <sub>4</sub>        | 1 M ZnSO <sub>4</sub>        | 2 M ZnSO <sub>4</sub>        | 4 M ZnSO <sub>4</sub>        |
|----------------------------------|--------------------------------|------------------------------|------------------------------|------------------------------|
| the 20 <sup>th</sup> CE (%)      | 99.02                          | 99.25                        | 99.24                        | 99.36                        |
| cycle life of Zn    Cu cells (h) | 147                            | 147                          | 200                          | 227                          |
| cycle life of Zn    Zn cells (h) | \                              | 799                          | 521                          | \                            |
|                                  | 0.5 M<br>Zn(TFSI) <sub>2</sub> | 1 M<br>Zn(TFSI) <sub>2</sub> | 2 M<br>Zn(TFSI) <sub>2</sub> | 4 M<br>Zn(TFSI) <sub>2</sub> |
| the 20 <sup>th</sup> CE (%)      | 90.2                           | 71.1                         | 86.4                         | 82.6                         |
| cycle life of Zn    Cu cells (h) | 81                             | 91                           | 123                          | 59                           |
| cycle life of Zn    Zn cells (h) | \                              | 149                          | 203                          | \                            |
|                                  | 0.5 M Zn(TfO) <sub>2</sub>     | 1 M Zn(TfO) <sub>2</sub>     | 2 M Zn(TfO) <sub>2</sub>     | 4 M Zn(TfO) <sub>2</sub>     |
| the 20 <sup>th</sup> CE (%)      | 86.9                           | 85.4                         | 68.7                         | 90.6                         |
| cycle life of Zn    Cu cells (h) | 120                            | 151                          | 79                           | 84                           |
| cycle life of Zn    Zn cells (h) | \                              | 212                          | 198                          | \                            |

**Table S5.** The average Coulombic efficiency and cycle life values of Zn anodes calculated from 2-4 parallel Zn||Cu (Ti, or SS) cells under different test conditions (1 M ZnSO<sub>4</sub> aqueous electrolyte).

|                                   |                                                               |                                                             |                                                             |                                                             |                                                              |                                                              |
|-----------------------------------|---------------------------------------------------------------|-------------------------------------------------------------|-------------------------------------------------------------|-------------------------------------------------------------|--------------------------------------------------------------|--------------------------------------------------------------|
|                                   | <b>1 mA cm<sup>-2</sup></b><br><b>0.5 mAh cm<sup>-2</sup></b> | <b>1 mA cm<sup>-2</sup></b><br><b>1 mAh cm<sup>-2</sup></b> | <b>1 mA cm<sup>-2</sup></b><br><b>2 mAh cm<sup>-2</sup></b> | <b>1 mA cm<sup>-2</sup></b><br><b>5 mAh cm<sup>-2</sup></b> | <b>1 mA cm<sup>-2</sup></b><br><b>8 mAh cm<sup>-2</sup></b>  | <b>1 mA cm<sup>-2</sup></b><br><b>10 mAh cm<sup>-2</sup></b> |
| <b>the 1<sup>st</sup> CE (%)</b>  | 85                                                            | 88.15                                                       | 88                                                          | 91.57                                                       | 92.2                                                         | 92.14                                                        |
| <b>the 20<sup>th</sup> CE (%)</b> | 98.85                                                         | 99.25                                                       | 99.43                                                       | \                                                           | \                                                            | \                                                            |
| <b>cycle life (h)</b>             | 193                                                           | 137                                                         | 230                                                         | 166                                                         | 110                                                          | 76                                                           |
|                                   | <b>2 mA cm<sup>-2</sup></b><br><b>1 mAh cm<sup>-2</sup></b>   | <b>2 mA cm<sup>-2</sup></b><br><b>2 mAh cm<sup>-2</sup></b> | <b>2 mA cm<sup>-2</sup></b><br><b>5 mAh cm<sup>-2</sup></b> | <b>2 mA cm<sup>-2</sup></b><br><b>8 mAh cm<sup>-2</sup></b> | <b>2 mA cm<sup>-2</sup></b><br><b>10 mAh cm<sup>-2</sup></b> |                                                              |
| <b>Cycle life (h)</b>             | 172                                                           | 137                                                         | 173                                                         | 105                                                         | 74                                                           |                                                              |
|                                   | <b>1 mA cm<sup>-2</sup></b><br><b>1 mAh cm<sup>-2</sup></b>   | <b>2 mA cm<sup>-2</sup></b><br><b>1 mAh cm<sup>-2</sup></b> | <b>5 mA cm<sup>-2</sup></b><br><b>1 mAh cm<sup>-2</sup></b> | <b>8 mA cm<sup>-2</sup></b><br><b>1 mAh cm<sup>-2</sup></b> | <b>10 mA cm<sup>-2</sup></b><br><b>1 mAh cm<sup>-2</sup></b> |                                                              |
| <b>the 20<sup>th</sup> CE (%)</b> | 99.25                                                         | 99.54                                                       | 99.64                                                       | 99.69                                                       | 99.76                                                        |                                                              |
|                                   | <b>Cu foil</b>                                                | <b>Ti foil</b>                                              | <b>SS</b>                                                   |                                                             |                                                              |                                                              |
| <b>the 20<sup>th</sup> CE (%)</b> | 99.25                                                         | 98.53                                                       | 55.41                                                       |                                                             |                                                              |                                                              |

**Table S6.** The average cycle life values of Zn anodes calculated from 2-4 parallel Zn | Zn symmetric cells under different test conditions (1 M ZnSO<sub>4</sub> aqueous electrolyte).

|                |                                                 |                                                 |                                                 |                                                  |
|----------------|-------------------------------------------------|-------------------------------------------------|-------------------------------------------------|--------------------------------------------------|
|                | 1 mA cm <sup>-2</sup> , 1 mAh cm <sup>-2</sup>  | 1 mA cm <sup>-2</sup> , 2 mAh cm <sup>-2</sup>  | 1 mA cm <sup>-2</sup> , 5 mAh cm <sup>-2</sup>  | 1 mA cm <sup>-2</sup> , 10 mAh cm <sup>-2</sup>  |
| cycle life (h) | 799                                             | 518                                             | 367                                             | 68                                               |
|                | 2 mA cm <sup>-2</sup> , 1 mAh cm <sup>-2</sup>  | 2 mA cm <sup>-2</sup> , 2 mAh cm <sup>-2</sup>  | 2 mA cm <sup>-2</sup> , 5 mAh cm <sup>-2</sup>  | 2 mA cm <sup>-2</sup> , 10 mAh cm <sup>-2</sup>  |
| Cycle life (h) | 1260                                            | 533                                             | 292                                             | 113                                              |
|                | 5 mA cm <sup>-2</sup> , 1 mAh cm <sup>-2</sup>  | 5 mA cm <sup>-2</sup> , 2 mAh cm <sup>-2</sup>  | 5 mA cm <sup>-2</sup> , 5 mAh cm <sup>-2</sup>  | 5 mA cm <sup>-2</sup> , 10 mAh cm <sup>-2</sup>  |
| Cycle life (h) | 1440                                            | 748                                             | 253                                             | 54                                               |
|                | 10 mA cm <sup>-2</sup> , 1 mAh cm <sup>-2</sup> | 10 mA cm <sup>-2</sup> , 2 mAh cm <sup>-2</sup> | 10 mA cm <sup>-2</sup> , 5 mAh cm <sup>-2</sup> | 10 mA cm <sup>-2</sup> , 10 mAh cm <sup>-2</sup> |
| Cycle life (h) | 558                                             | 249                                             | 190                                             | 87                                               |

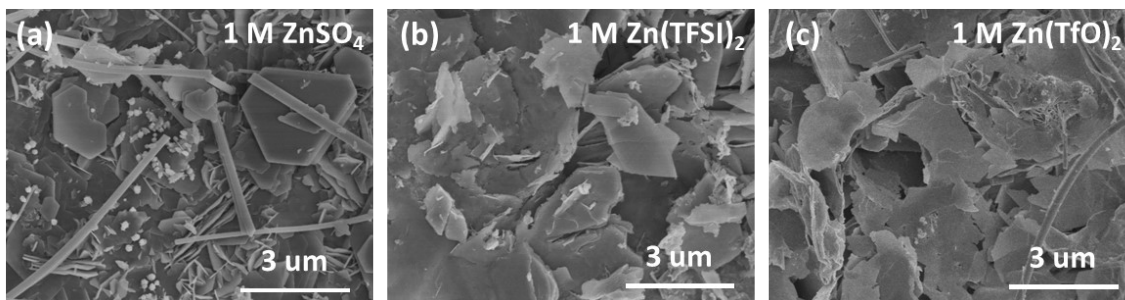

**Fig. S1** SEM images of Zn deposition in (a) 1 M  $\text{ZnSO}_4$ , (b) 1 M  $\text{Zn(TFSI)}_2$  and (c) 1 M  $\text{Zn(TfO)}_2$  electrolytes ( $1 \text{ mA cm}^{-2}$ ,  $1 \text{ mAh cm}^{-2}$ ).

Figure S1 shows that the morphology of deposited Zn cycled in 1 M  $\text{Zn(TFSI)}_2$  and 1 M  $\text{Zn(TfO)}_2$  aqueous electrolytes show large, irregular flaky structures, which are different from the dense and platelet-like morphology observed in 1 M  $\text{ZnSO}_4$  aqueous electrolyte.

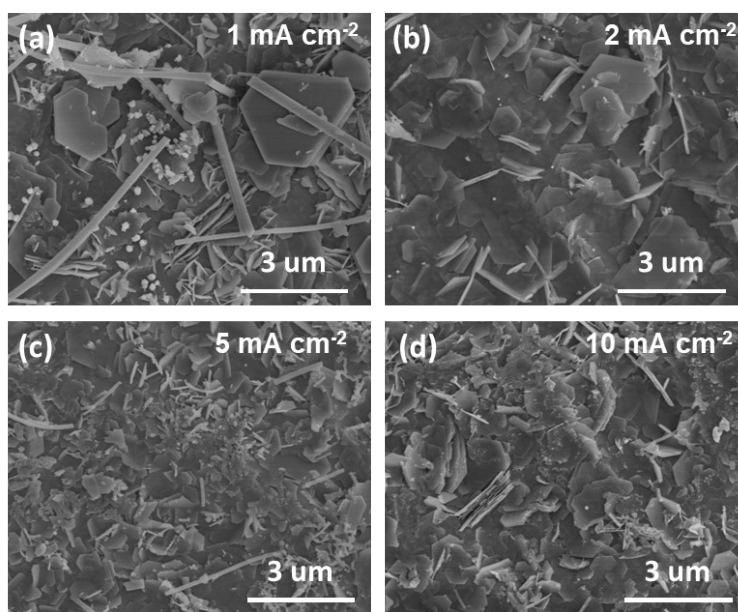

**Fig. S2** SEM images of Zn deposition under different current densities in 1 M  $\text{ZnSO}_4$  electrolytes. (a)  $1 \text{ mA cm}^{-2}$ , (b)  $2 \text{ mA cm}^{-2}$ , (c)  $5 \text{ mA cm}^{-2}$  and (d)  $10 \text{ mA cm}^{-2}$  for  $1 \text{ mAh cm}^{-2}$  capacity.

Figure S2 reveals that small current densities favor the growth of large Zn deposition morphology with reduced surface area, while large current densities benefit smaller and more uniform Zn deposition morphology due to high overpotential in 1 M  $\text{ZnSO}_4$  electrolytes.

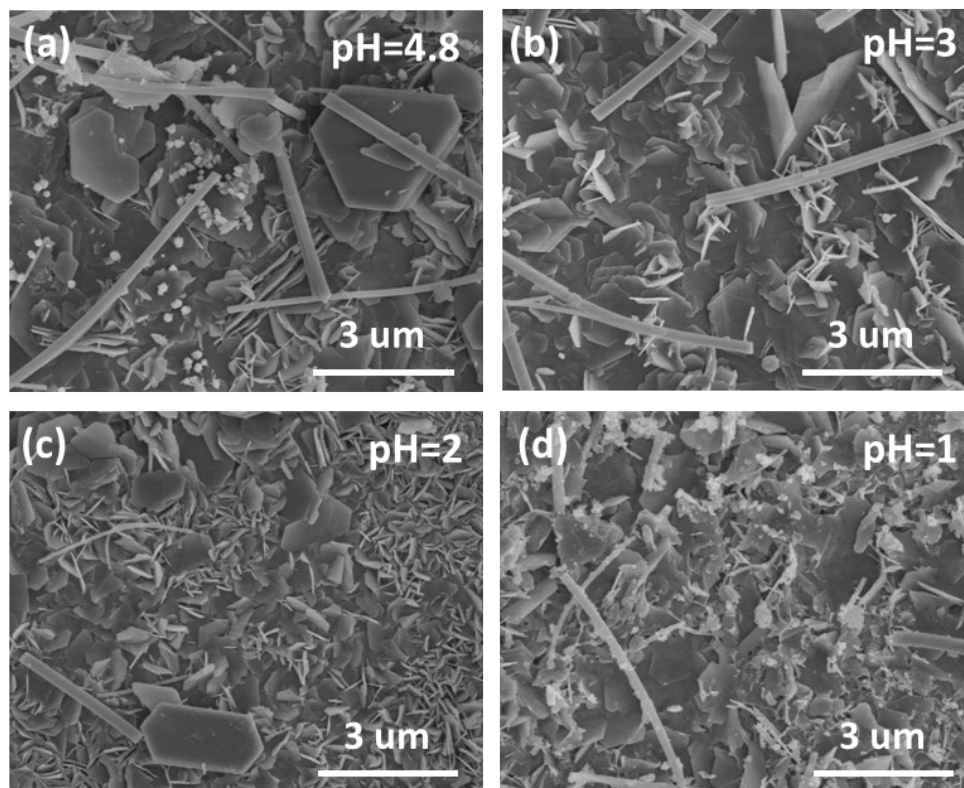

**Fig. S3** SEM images of Zn deposition in 1 M ZnSO<sub>4</sub> electrolyte with different pH values. (a) pH=4.8, (b) pH=3, (c) pH=2 and (d) pH=1. (1 mA cm<sup>-2</sup>, 1 mAh cm<sup>-2</sup>, the pH values of 1 M ZnSO<sub>4</sub> electrolytes are controlled by adding a trace of H<sub>2</sub>SO<sub>4</sub> solution with different concentrations)

Figure S3 shows that the deposited Zn platelets turn to be smaller size and grow vertically along with the decrease of pH values in 1 M ZnSO<sub>4</sub> electrolytes.



**The detailed calculation process for the relevant estimation of the gravimetric energy density for aqueous Zn batteries:**

- 1) The energy density of aqueous Zn batteries based on the total mass of the cell is according to the following equation S1<sup>21</sup> (E: the estimated gravimetric energy density, U: the average voltage of the cell, C<sub>+</sub>: the specific capacity of cathode material, m<sub>+</sub>: the mass of cathode material, m<sub>total</sub>: the mass of the whole cell):

$$E = \frac{U \cdot C_+ \cdot m_+}{m_{\text{total}}} \quad (\text{S1})$$

- 2) N/P ratio (R) corresponds to the following equation S2 (C<sub>-</sub>: the specific capacity of Zn anode, m<sub>-</sub>: the mass of Zn anode):

$$R = \frac{m_- \cdot C_-}{m_+ \cdot C_+} \quad (\text{S2})$$

- 3) k presents the mass fraction of active cathode and anode materials in the total mass of the whole cell, which is calculated according to the equation S3:

$$k = \frac{m_+ + m_-}{m_{\text{total}}} \quad (\text{S3})$$

- 4) By applying equations S2 and S3 in equation S1, the gravimetric energy density based on the k value and N/P ratio (R) can be obtained as shown in equation S4:

$$E = k \frac{U}{\frac{1}{C_+} + \frac{R}{C_-}} \quad (\text{S4})$$

**Taking examples of published aqueous Zn batteries, we calculate the achievable energy density of the batteries according to equation 1:**

**Example 1: Self-Healing SeO<sub>2</sub> Additives Enable Zinc Metal Reversibility in Aqueous ZnSO<sub>4</sub> Electrolytes (Advanced Functional Materials, 2022, 32, 2112091)<sup>1</sup>**

Reported specific capacity of MnO<sub>2</sub> cathode (C<sub>+</sub>): 403 mAh g<sup>-1</sup>

Specific capacity of Zn anode (C<sub>-</sub>): 819 mAh g<sup>-1</sup>

Reported N/P ratio of Zn || MnO<sub>2</sub> full cell (R): 4.2

Reported average voltage of Zn || MnO<sub>2</sub> full cell (U): 1.3 V

k value: 0.6

According to the equation 1, the calculated achievable energy density of Zn || MnO<sub>2</sub> full cell could be 102 Wh kg<sup>-1</sup> when k of 0.6 is used as the mass fraction of active materials in the cell.

***Example 2: Advanced Buffering Acidic Aqueous Electrolytes for Ultra-Long Life Aqueous Zinc-Ion Batteries (Small, 2022, 18, 2200742)<sup>22</sup>***

Reported specific capacity of V<sub>2</sub>O<sub>5</sub> cathode (C<sub>+</sub>): 291 mAh g<sup>-1</sup> at 0.1 C

Specific capacity of Zn anode (C<sub>-</sub>): 819 mAh g<sup>-1</sup>

Reported N/P ratio of Zn || V<sub>2</sub>O<sub>5</sub> full cell (R): 2.2

Reported average voltage of Zn || V<sub>2</sub>O<sub>5</sub> full cell (U): 0.9 V

k value: 0.6

According to the equation 1, the calculated achievable energy density of Zn || V<sub>2</sub>O<sub>5</sub> full cell could be 88 Wh kg<sup>-1</sup> when k of 0.6 is used as the mass fraction of active materials in the cell.

## References

1. C. Huang, X. Zhao, Y. Hao, Y. Yang, Y. Qian, G. Chang, Y. Zhang, Q. Tang, A. Hu, X. Chen, *Advanced Functional Materials*, 2022, **32**, 2112091.
2. K. Guan, L. Tao, R. Yang, H. Zhang, N. Wang, H. Wan, J. Cui, J. Zhang, H. Wang and H. Wang, *Advanced Energy Materials*, 2022, **12**, 2103557.
3. B. Wang, R. Zheng, W. Yang, X. Han, C. Hou, Q. Zhang, Y. Li, K. Li and H. Wang, *Advanced Functional Materials*, 2022, **32**, 2112693.
4. M. Yan, N. Dong, X. Zhao, Y. Sun and H. Pan, *ACS Energy Letters*, 2021, **6**, 3236-3243.
5. F. Wang, O. Borodin, T. Gao, X. Fan, W. Sun, F. Han, A. Faraone, J. A. Dura, K. Xu and C. Wang, *Nature materials*, 2018, **17**, 543-549.
6. L. Cao, D. Li, T. Deng, Q. Li and C. Wang, *Angewandte Chemie*, 2020, **59**, 19292-19296.
7. H. Qiu, X. Du, J. Zhao, Y. Wang, J. Ju, Z. Chen, Z. Hu, D. Yan, X. Zhou and G. Cui, *Nature communications*, 2019, **10**, 5374.
8. G. Ma, L. Miao, Y. Dong, W. Yuan, X. Nie, S. Di, Y. Wang, L. Wang and N. Zhang, *Energy Storage Materials*, 2022, **47**, 203-210.
9. L. Cao, D. Li, T. Pollard, T. Deng, B. Zhang, C. Yang, L. Chen, J. Vatamanu, E. Hu, M. J. Hourwitz, L. Ma, M. Ding, Q. Li, S. Hou, K. Gaskell, J. T. Fourkas, X. Q. Yang, K. Xu, O. Borodin and C. Wang, *Nature nanotechnology*, 2021, **16**, 902-910.
10. J. Shi, K. Xia, L. Liu, C. Liu, Q. Zhang, L. Li, X. Zhou, J. Liang and Z. Tao, *Electrochimica Acta*, 2020, **358**, 136937.
11. B. W. Olbasa, C. J. Huang, F. W. Fenta, S. K. Jiang, S. A. Chala, H. C. Tao, Y. Nikodimos, C. C. Wang, H. S. Sheu, Y. W. Yang, T. L. Ma, S. H. Wu, W. N. Su, H. Dai and B. J. Hwang, *Advanced Functional Materials*, 2021, **32**, 2103959.
12. Y. Dong, L. Miao, G. Ma, S. Di, Y. Wang, L. Wang, J. Xu and N. Zhang, *Chemical science*, 2021, **12**, 5843-5852.
13. Z. Hou, H. Tan, Y. Gao, M. Li, Z. Lu and B. Zhang, *Journal of Materials Chemistry A*, 2020, **8**, 19367-19374.

14. Y. Jin, K. S. Han, Y. Shao, M. L. Sushko, J. Xiao, H. Pan and J. Liu, *Advanced Functional Materials*, 2020, **30**, 2003932.
15. M. Yan, C. Xu, Y. Sun, H. Pan and H. Li, *Nano Energy*, 2021, **82**, 105739.
16. B. Raza, A. Naveed, J. chen, H. Lu, T. Rasheed, J. Yang, Y. NuLi and J. Wang, *Energy Storage Materials*, 2022, **46**, 523-534.
17. P. Sun, L. Ma, W. Zhou, M. Qiu, Z. Wang, D. Chao and W. Mai, *Angewandte Chemie*, 2021, **60**, 18247-18255.
18. H. Yang, Y. Qiao, Z. Chang, H. Deng, X. Zhu, R. Zhu, Z. Xiong, P. He and H. Zhou, *Advanced materials*, 2021, **33**, 2102415.
19. J. Zhao, J. Zhang, W. Yang, B. Chen, Z. Zhao, H. Qiu, S. Dong, X. Zhou, G. Cui and L. Chen, *Nano Energy*, 2019, **57**, 625-634.
20. H. He, H. Qin, F. Shen, N. Hu and J. Liu, *Chemical communications*, 2021, **57**, 11477-11480.
21. J. Peng, C. Zu, H. Li, *Energy Storage Science and Technology*, 2013, **2**, 55.
22. X. Zhao, X. Zhang, N. Dong, M. Yan, F. Zhang, K. Mochizuki, H. Pan, *Small*, 2022, **18**, 2200742.
